# Supplementary material for: Redox activity of nickel and vanadium porphyrins: a possible mechanism behind petroleum genesis and maturation?
Source: Royal Society of Chemistry journal article supplement (doi:10.1039/c9ra01104h), 2019-01-01
Supplement: c9ra01104h1.pdf [file c9ra01104h1.pdf]

## Electronic Supplementary Information

# Redox activity of nickel and vanadium porphyrins: also a possible mechanism behind petroleum genesis and maturation?

G. Munoz, B. K. Guenessee, D. Bégué, B. Bouyssiere, I. Baraille, G. Vallverdu, H. Santos Silva

February 1, 2019

## Contents

### List of Figures

|    |                                                                                                                   |    |
|----|-------------------------------------------------------------------------------------------------------------------|----|
| 1  | Total electronic density mapped by the molecular electrostatic potential surfaces. . . . .                        | 2  |
| 2  | PorVO molecule showing the localization of the unpaired electron over the VO region. . . . .                      | 3  |
| 3  | Reaction path of methanol into methanal conversion catalyzed by one VO porphyrin. . . . .                         | 4  |
| 4  | Geometries of the transition states. . . . .                                                                      | 5  |
| 5  | Reaction coordinate scan of the PorVO—H dissociation in both $S_0$ and $T_0$ spin states. . . . .                 | 6  |
| 6  | Molecular orbital 95 (HOMO), relative to vanadium $d_{xy}$ . . . . .                                              | 7  |
| 7  | Structure de PorNi + ligand: (a) $\text{SH}^-$ ; (b) $\text{CH}_3\text{CH}_2\text{COO}^-$ ; (c) Pyridine. . . . . | 8  |
| 8  | 2D PES scand of the PorNi- $\text{H}_2$ system. . . . .                                                           | 9  |
| 9  | 3D PES scand of the PorNi- $\text{H}_2$ system. . . . .                                                           | 9  |
| 10 | $\text{H}_2$ adsorption geometry on top of PorNi. . . . .                                                         | 10 |

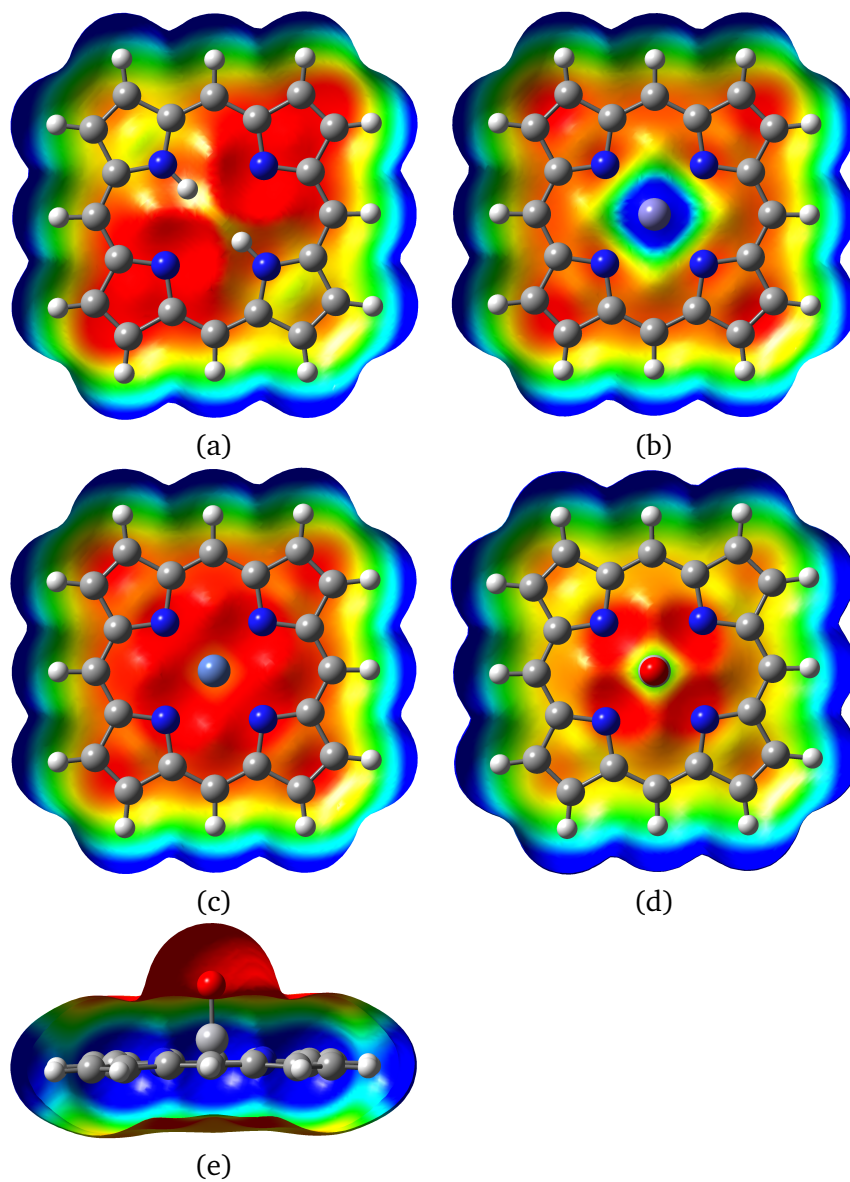

**Figure 1** Total electronic density mapped by the Molecular Electrostatic Potential surfaces of (a) PorH<sub>2</sub>, (b) PorFe, (c) PorNi, (d) PorVO (top) and (e) PorVO (side). The scale of color varies from  $-2.10^{-2}$  (red) to  $2.10^{-2} e$  (blue).

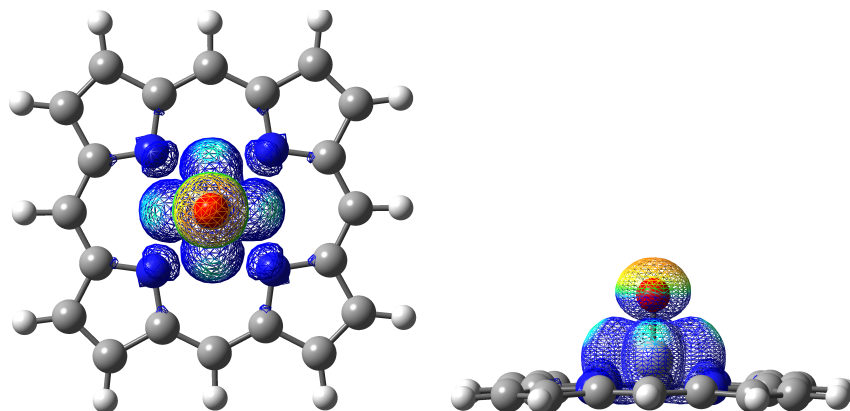

**Figure 2** PorVO molecule showing the localization of the unpaired electron over the VO region (total spin density mapped by the molecular electrostatic potential). The spin density varies from 0 (red) to 0.5 (blue).

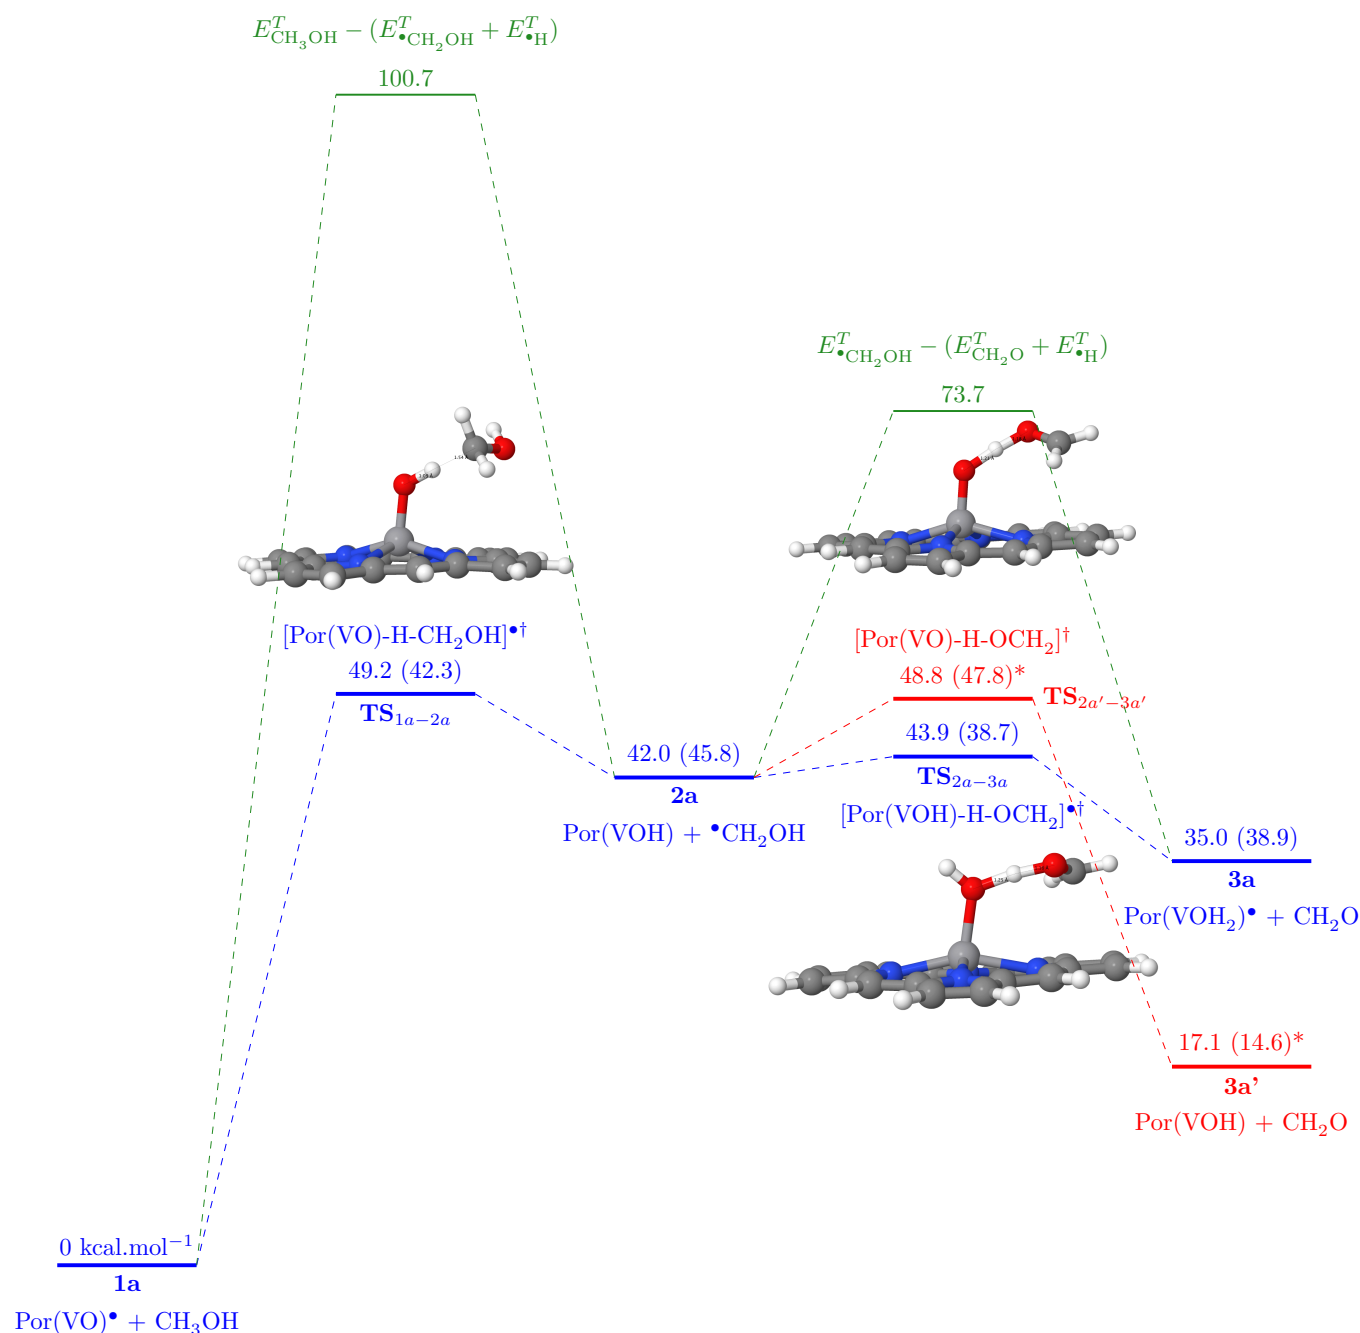

**Figure 3** Reaction path of methanol into methanal conversion catalyzed by one VO porphyrin. 1a is constituted of  $\text{PorVO}$  ( $D_0$ ) +  $\text{CH}_3\text{OH}$  ( $S_0$ ) and 1b is  $\text{PorVO}$  ( $Q_0$ ) +  $\text{CH}_3\text{OH}$  ( $S_0$ ).  $\text{TS}_{1a-2a}$  is a  $D_0$  state. 2a is constituted of  $\text{PorVOH}$  ( $T_0$ ) +  $\bullet\text{CH}_2\text{OH}$  ( $D_0$ ) and 2b is  $\text{PorVOH}$  ( $S_0$ ) +  $\bullet\text{CH}_2\text{OH}$  ( $D_0$ ).  $\text{TS}_{2a-3a}$  is a  $Q_0$  state whereas  $\text{TS}'_{2a-3a}$  is a  $D_0$  state. Finally, 3a is composed of  $\text{PorVOH}_2$  in  $Q_0$  state and  $\text{CH}_2\text{O}$  in  $S_0$  state whereas 3b is  $\text{PorVOH}_2$  in  $D_0$  state and  $\text{CH}_2\text{O}$  in  $S_0$ . The BDE(n.c) marked levels stand for the required energy barriers when no catalyst is present. It means that, to abstract the first hydrogen of the  $\text{CH}_3$  group, one would need  $91.8 \text{ kcal.mol}^{-1}$  to do so, whereas one needs  $49.2 \text{ kcal.mol}^{-1}$  to have it abstracted using a porphyrin molecule. Further on, to abstract the hydrogen of the hydroxyl group, without catalyst, one would need to give  $31.7 \text{ kcal.mol}^{-1}$  of extra energy (the showed number was renormalized to have 2a as reference) instead of  $1.9$  only  $\text{kcal.mol}^{-1}$  when a porphyrin is involved. The gray labels indicate the reaction path passing by another pristine  $\text{PorVO}$  porphyrin to abstract the hydroxyl hydrogen.  $\text{TS}_{2a-4a}$  is a  $T_0$  state whereas  $\text{TS}'_{2a-4a}$  is the  $S_0$  equivalent. They result both 4a or 4b which are composed of either  $\text{PorVOH}$  ( $T_0$ ) and  $\text{CH}_2\text{O}$  ( $S_0$ ) or  $\text{PorVOH}$  ( $S_0$ ) and  $\text{CH}_2\text{O}$  ( $S_0$ ), respectively.

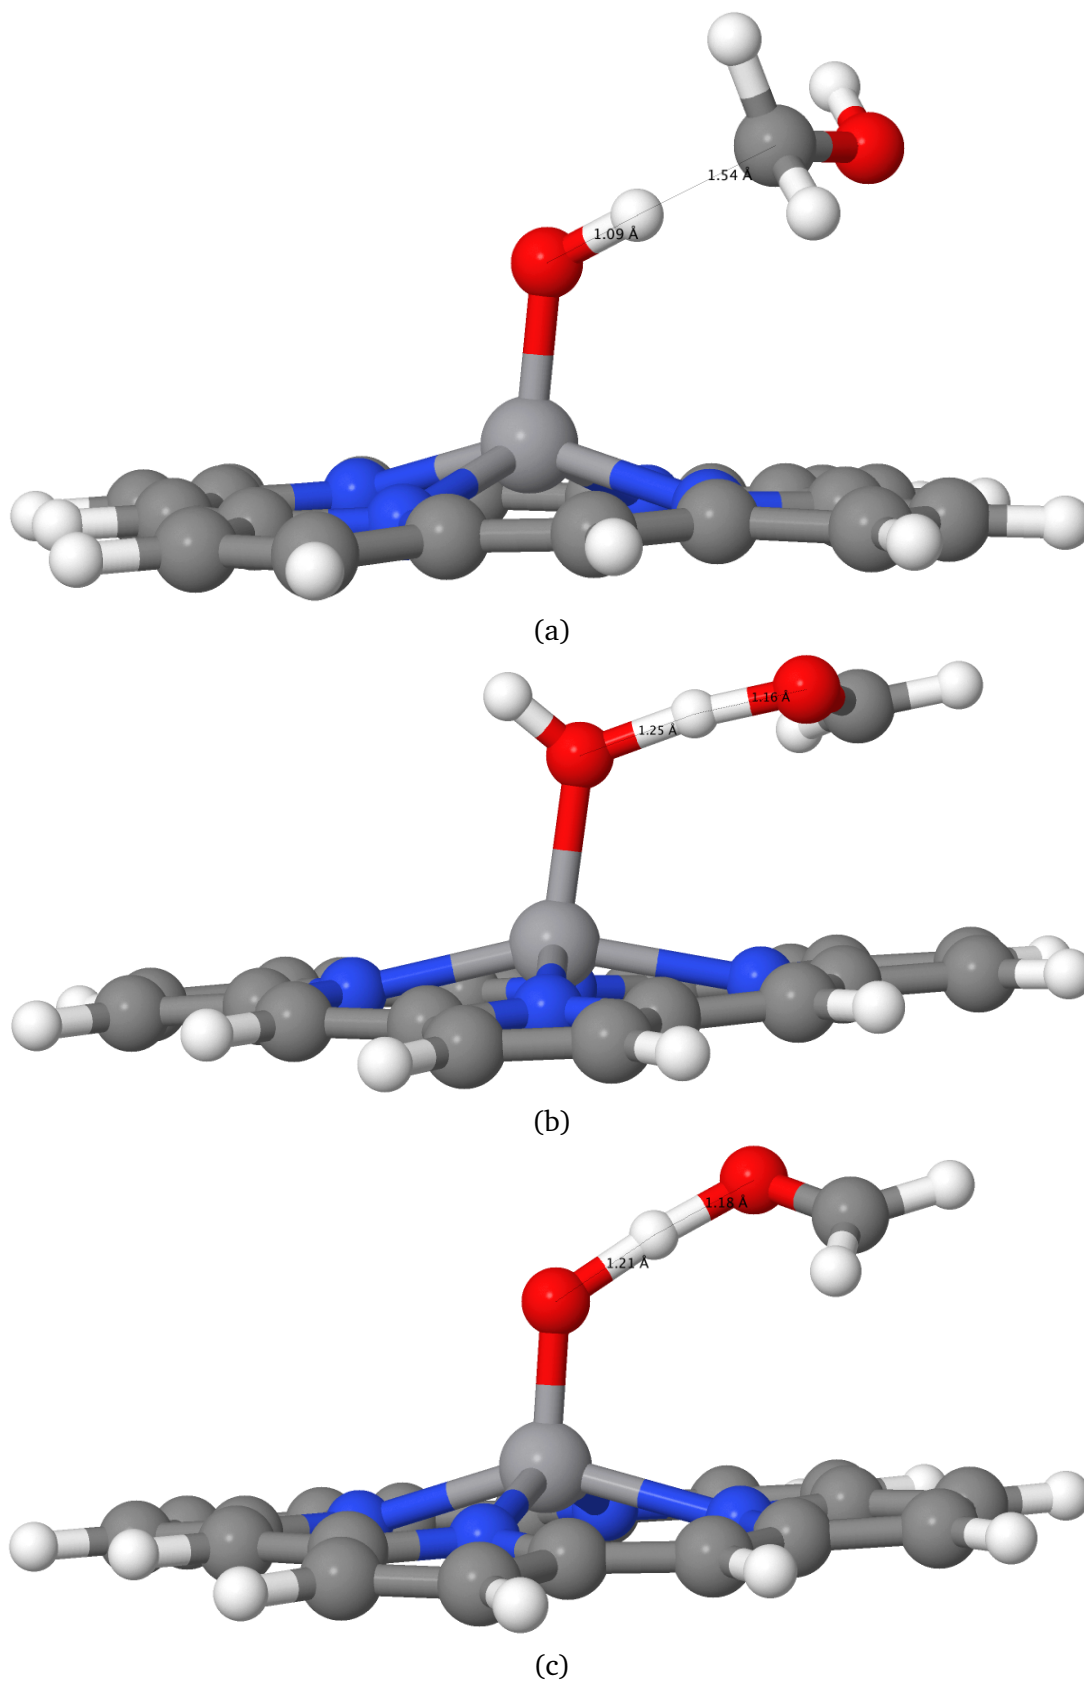

**Figure 4** Geometries of the transition states in their lowest energy spin states. (a)  $TS_{1a-2a}$ , (b)  $TS_{2a-3a}$  and (c)  $TS_{2a-4a}$ .

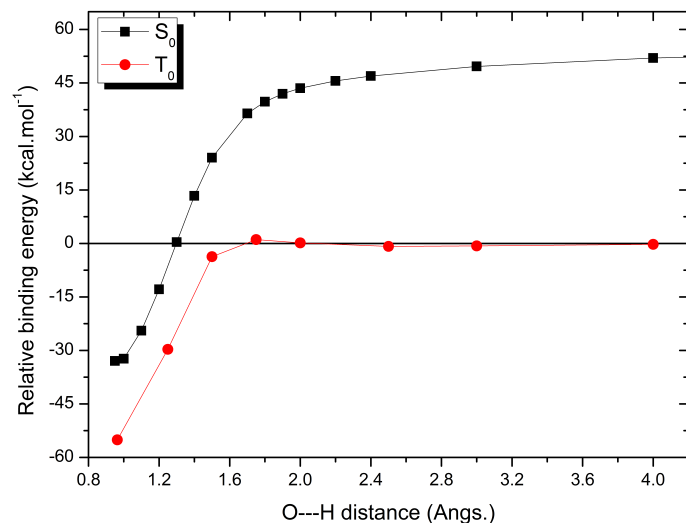

**Figure 5** Reaction coordinate scan of the PorVO—H dissociation in both  $S_0$  and  $T_0$  spin states.  $S_0$  fails to describe this dissociation curve since it tries to share a single electron in two different atoms far apart (oxygen and hydrogen). The  $T_0$  spin state describes the dissociation curve appropriately and indicates a dissociation energy of  $\sim 52$  kcal.mol $^{-1}$ . The reference is the PorVO system separated from the H $^\bullet$  by an infinite distance.

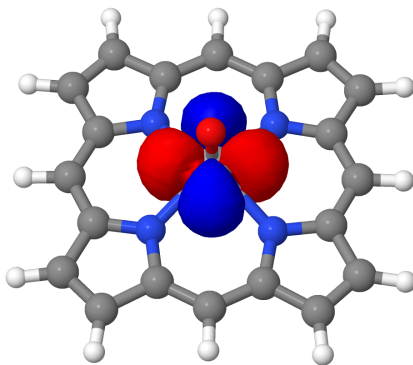

**Figure 6** Molecular orbital 95 (HOMO), relative to vanadium  $d_{xy}$ .

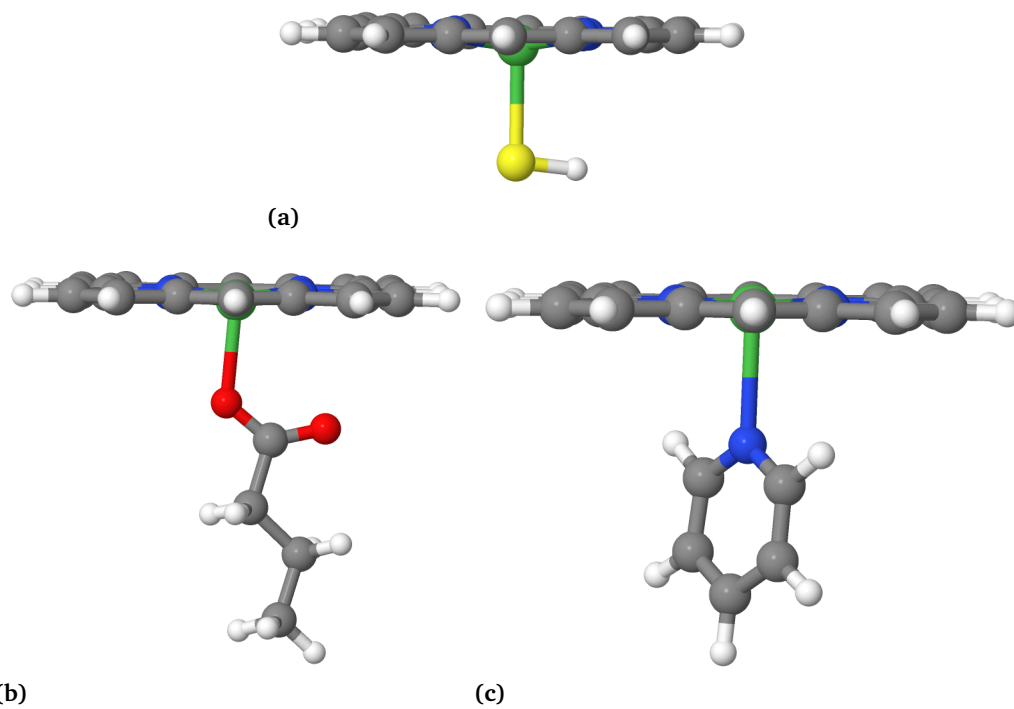

**Figure 7** Structure de PorNi + ligand: (a)  $\text{SH}^-$ ; (b)  $\text{CH}_3\text{CH}_2\text{COO}^-$ ; (c) Pyridine.

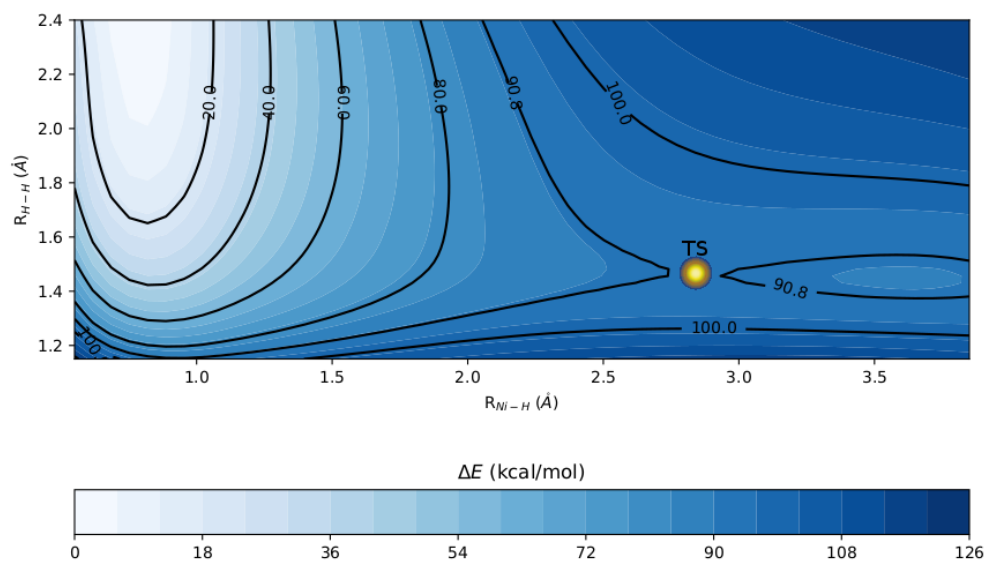

**Figure 8** 2D PES scand of the PorNi-H<sub>2</sub> system.

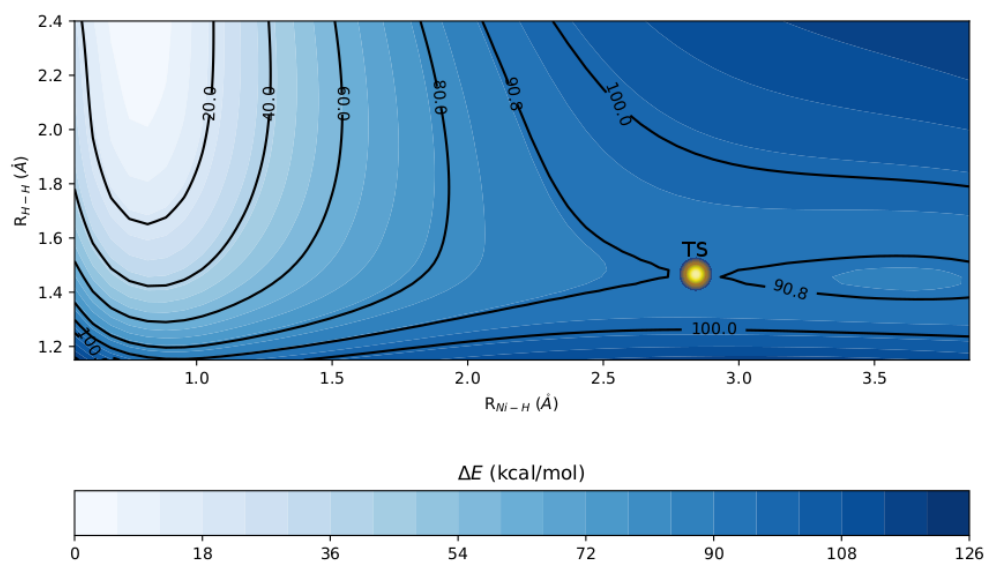

**Figure 9** 3D PES scand of the PorNi-H<sub>2</sub> system.

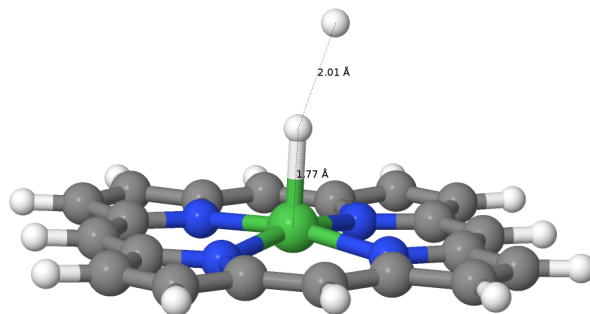

**Figure 10** H<sub>2</sub> adsorption geometry on top of PorNi.
